# Supplementary material for: Assessing the Oxidative Degradation of N-Methylpyrrolidone (NMP) in Microelectronic Fabrication Processes by Using a Multiplatform Analytical Approach
Source: Hindawi journal article supplement (doi:10.1155/2020/8265054), 2020-03-04
Supplement: f1 [file 8265054.f1.pdf]

**Page S-1.**

**Gavin Lennon<sup>a</sup>, Shannon Willox<sup>a</sup>, Ragini Ramdas<sup>b</sup>, Scott Funston<sup>b</sup>, Matthew Klunc,  
Robert Pieh<sup>c</sup>, Stewart Fairlie<sup>c</sup>, Sara Dobbin<sup>d</sup> and Diego F. Cobice<sup>d</sup>**

<sup>a</sup> Queen's University Belfast, School of Chemistry and Chemical Engineering, David Keir Building,  
Stranmillis Road, Belfast, Antrim, BT7 1NN.

<sup>b</sup> Seagate Technology PLC, Springtown Industrial Estate, Londonderry BT48 0LY

<sup>c</sup> Seagate Technology PLC, Bloomington, Minnesota, MN 55435.

<sup>d</sup> Ulster University, Centre of Molecular Biosciences, Mass Spectrometry Centre, Cromore Road,  
Coleraine Campus, Londonderry, BT52 1SA, UK. Electronic address: d.cobice@ulster.ac.uk.

**Title: Assessing the Oxidative Degradation of N-methyl Pyrrolidone (NMP) in  
Microelectronic Fabrication Processes by using a Multi-platform Analytical  
Approach**

***Table of content***

**1. Supplementary Data**

|            |                             |           |
|------------|-----------------------------|-----------|
| <b>1.1</b> | <b>Supplementary figure</b> | <b>S2</b> |
| <b>1.2</b> | <b>Supplementary tables</b> | <b>S4</b> |

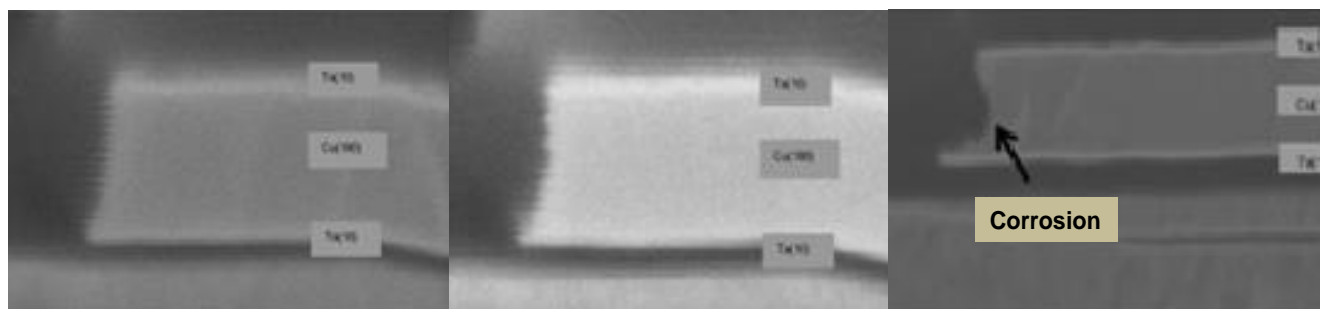

**Figure S1:** Focused ion beam (FIB) analysis of the contact reader stack submerged in NMP after 400 s, 980 s, and 1800 s using a FEI FIB200TEM

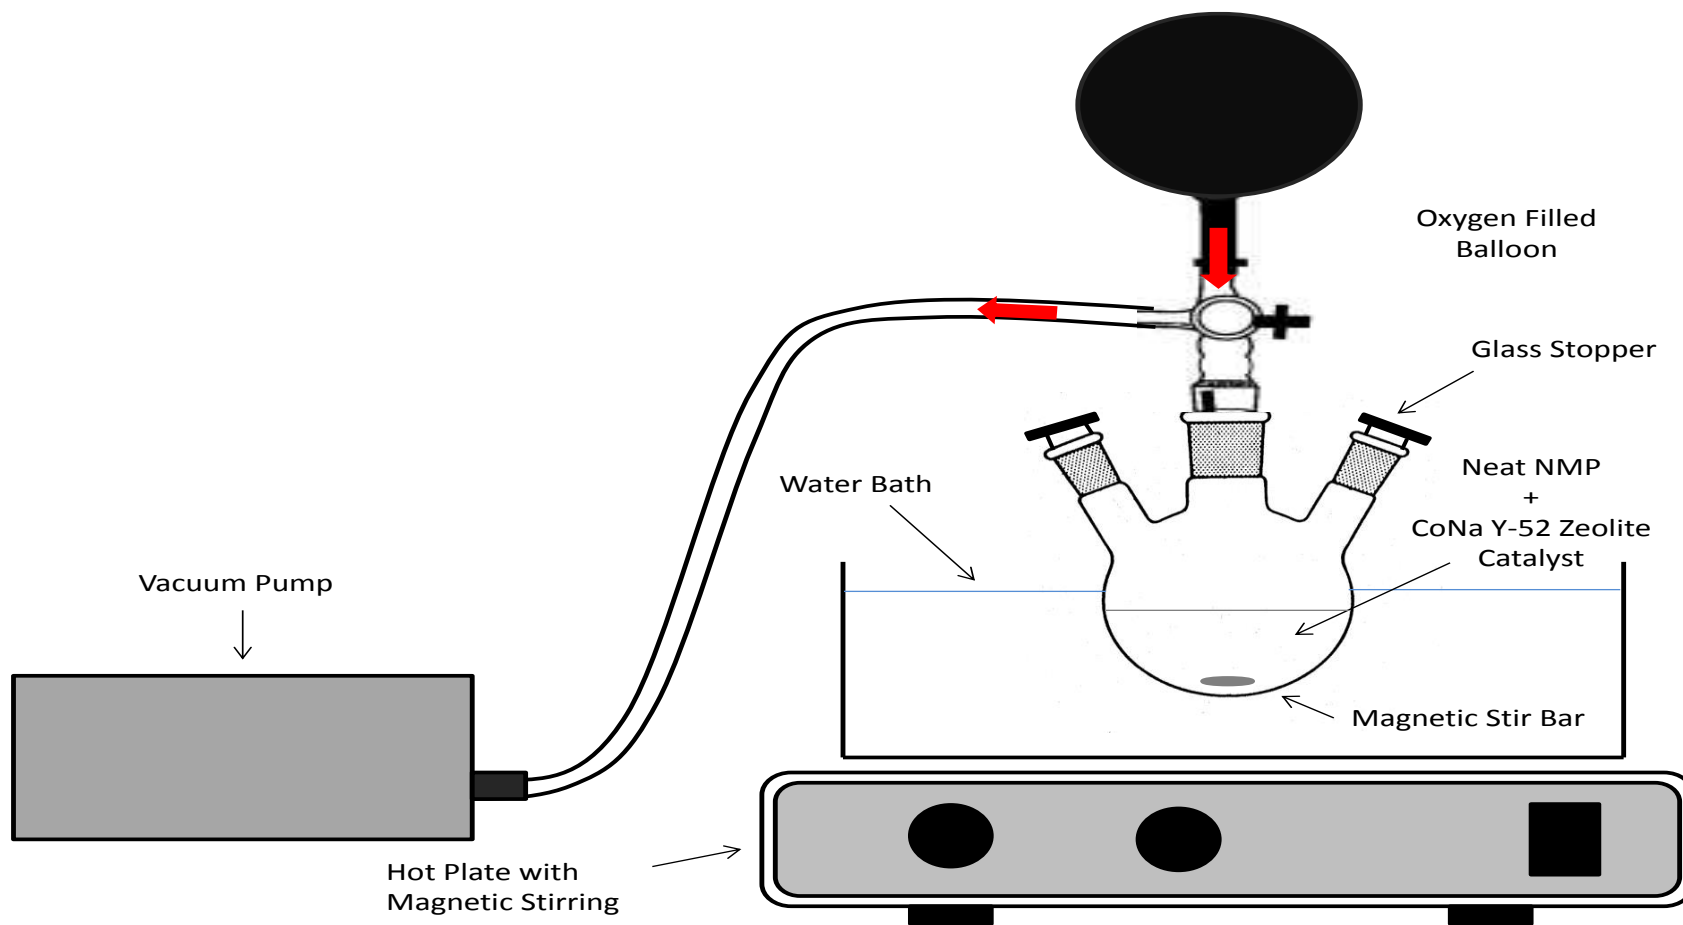

**Figure S2:** Experimental design used for catalytic oxidation of NMP in Oxygen. Adapted from Victor *et.*, 2015.

**Table S1: ICP-OES Calibration Standard Solution Compositions**

| Calibration Standard | Volume of NMP (mL) | Volume of Working Standard A (mL) <sup>a</sup> | Volume of Working Standard B (mL) <sup>b</sup> | Volume of Deionised Water |
|----------------------|--------------------|------------------------------------------------|------------------------------------------------|---------------------------|
| 5                    | 10                 | 20                                             | -                                              | 70                        |
| 4                    | 10                 | 10                                             | -                                              | 80                        |
| 3                    | 10                 | 1                                              | -                                              | 89                        |
| 2                    | 10                 | -                                              | 10                                             | 80                        |
| 1                    | 10                 | -                                              | 1                                              | 89                        |

<sup>a</sup> High Concentration Working Standard (10 mg/L)

<sup>b</sup> Low Concentration Working Standard (0.1 mg/L)

**Table S2: LC/UV and LC/MS gradient profile.**

| Minutes | Flow mL/min | Mobile Phase |    |
|---------|-------------|--------------|----|
|         |             | % A          | %B |
| 0.00    | 0.5         | 98           | 2  |
| 0.20    | 0.5         | 98           | 2  |
| 0.50    | 0.7         | 98           | 2  |
| 5.00    | 0.7         | 70           | 30 |
| 9.00    | 1.0         | 60           | 40 |
| 9.01    | 1.0         | 98           | 2  |
